# Supplementary material
Source: PubMed Central journal article supplement (PMC3432859)
Supplement: NIHMS396291-supplement-Supplementary_Data.pdf [file NIHMS396291-supplement-Supplementary_Data.pdf]

## SUPPLEMENTARY FIGURES

N-terminal deletion does not affect  $\alpha$ -synuclein membrane binding, self-association and toxicity in human neuroblastoma cells, unlike yeast

*Katherina Vamvaca, Peter T. Lansbury Jr. & Leonidas Stefanis*

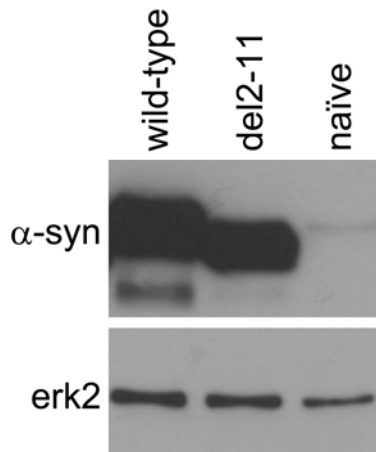

Fig. S1. Wild-type and del2-11  $\alpha$ -syn levels in polyclonal SHSY-5Y cells are about 30-fold higher than endogenous  $\alpha$ -syn levels in naïve cells. Erk2 serves as a loading control.

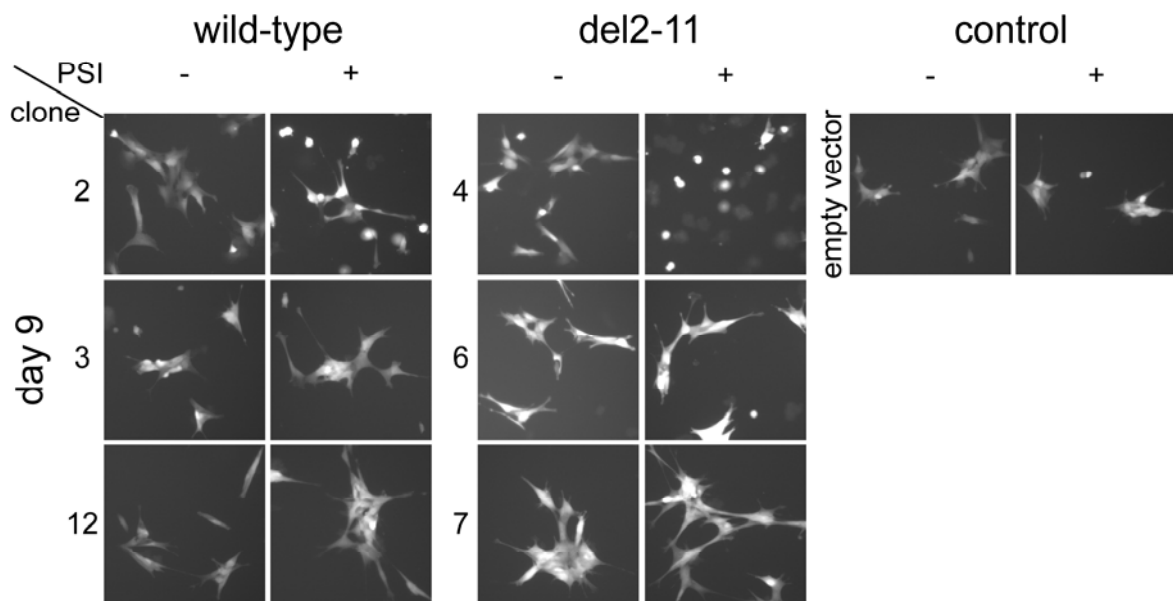

Fig. S2. Fluorescence microscopy images of wild-type, del2-11 and empty-vector control clones, after a 9-day RA-treatment, in the absence and presence of PSI (added on day 5).
